# Supplementary material for: Urinary Tract Infection-Related Mortality Trends in Adults Aged ≥ 25 Years in the United States: A CDC WONDER Analysis from 1999 to 2023
Source: Research Square preprint supplement (doi:10.21203/rs.3.rs-7811606/v1), 2025-11-19
Supplement: Supplementary file 1 [file 7375605769aba44d28550157.docx]

**Supplemental Materials**

**Supplemental Table 1:** ICD-10 Codes Utilized

| **ICD-10 Codes for UTI-Related Deaths** |
| --- |
| Cystitis (N30) |
| Urinary tract infection, site not specified (N39.0) |
| Nonspecific urethritis (N34.1) |
| Other urethritis (N34.2) |
| Acute tubulo-interstitial nephritis (N10) |
| Nonobstructive reflux-associated chronic pyelonephritis (N11.0) |
| Chronic obstructive pyelonephritis (N11.1) |
| **ICD-10 Codes for Leading Causes of UTI-Associated Deaths (UCD-15 Leading Causes of Death)** |
| Heart Disease (I00-I09, I11, I13, I20-I51) |
| Malignant neoplasms (C00-C97) |
| Cerebrovascular diseases (I60-I69) |
| Alzheimer's disease (G30) |
| Influenza and pneumonia (J09-J18) |
| Diabetes mellitus (E10-E14) |
| Sepsis (A40-A41) |
| Chronic lower respiratory diseases (J40-J47) |
| Nephritis, nephrotic syndrome, and nephrosis (N00-N07, N17-N19, N25-N27) |
| Unintentional injuries (V01-X59, Y85-Y86) |
| Parkinson's disease (G20-G21) |
| Enterocolitis due to Clostridium difficile (A04.7) |
| COVID-19 (U07.1) |
| Pneumonitis due to solids and liquids (J69) |
| Chronic liver disease and cirrhosis (K70, K73-K74) |
| Essential hypertension and hypertensive renal disease (I10, I12, I15) |
| Prostatic hyperplasia (N40) |
| Nutritional deficiencies (E40-E64) |

UTI = Urinary Tract Infection, UCD = Underlying Cause of Death

**Supplemental Table 2.** Absolute number of UTI-related deaths and percent of deaths among adults aged ≥ 25 years stratified by Overall, Sex/Gender, Race/Ethnicity, Age Group, Place of Death, Urbanization, and U.S. Census Region in the United States from 1999 to 2023.

| **Variables** | **Deaths** | **% of Total Deaths** |
| --- | --- | --- |
| Overall | 1,037,471 | 100 % |
| **Sex/Gender** | | |
| Women | 659,018 | 63.52 % |
| Men | 378,453 | 36.48 % |
| **Race/Ethnicity** | | |
| NH American Indian or Alaska Native | 5,966 | 0.58 % |
| NH Asian or Pacific Islander | 19,802 | 1.91 % |
| NH Black or African American | 109,063 | 10.54 % |
| NH White | 842,945 | 81.49 % |
| Hispanic or Latino | 56,690 | 5.48 % |
| **Age Group** | | |
| Younger Adults | 11,595 | 1.12 % |
| Middle-aged Adults | 86,593 | 8.35 % |
| Older Adults | 939,283 | 90.53 % |
| **Location of Death** | | |
| Medical Facilities | 641,352 | 61.82% |
| Decedent's home | 93,101 | 8.97% |
| Hospices | 48,935 | 4.72% |
| Nursing home/long-term care | 226,524 | 21.83% |
| Other/unknown | 27,559 | 2.66% |
| **Urbanization (1999 - 2020)** | | |
| Urban Areas | 695,875 | 67.07 % |
| Rural Areas | 180,436 | 17.39 % |
| **Census Region** | | |
| Northeast | 181,032 | 17.45 % |
| Midwest | 223,820 | 21.57 % |
| South | 412,511 | 39.76 % |
| West | 220,108 | 21.22 % |

NH: Non-Hispanic

**Supplemental Table 3**. Overall and Sex/Gender-stratified UTI-Related Age-Adjusted Mortality Rate among Adults Aged ≥ 25 years in the United States, 1999 to 2023.

| **Age-Adjusted Rate /100,000 (95% CI)** | | | |
| --- | --- | --- | --- |
| **Year** | **Overall** | **Men** | **Women** |
| 1999 | 20.04 (19.83 - 20.25) | 19.28 (18.93 - 19.63) | 20.40 (20.14 - 20.67) |
| 2000 | 19.54 (19.34 - 19.75) | 18.68 (18.34 - 19.03) | 19.98 (19.72 - 20.24) |
| 2001 | 19.31 (19.10 - 19.51) | 17.96 (17.63 - 18.29) | 20.00 (19.74 - 20.26) |
| 2002 | 19.27 (19.07 - 19.47) | 17.96 (17.63 - 18.29) | 19.97 (19.72 - 20.23) |
| 2003 | 19.10 (18.90 - 19.30) | 17.92 (17.59 - 18.24) | 19.70 (19.45 - 19.96) |
| 2004 | 18.76 (18.56 - 18.95) | 17.74 (17.43 - 18.06) | 19.38 (19.13 - 19.64) |
| 2005 | 20.09 (19.89 - 20.29) | 18.76 (18.44 - 19.08) | 20.87 (20.61 - 21.13) |
| 2006 | 19.21 (19.02 - 19.41) | 17.89 (17.58 - 18.20) | 20.05 (19.80 - 20.30) |
| 2007 | 19.12 (18.92 - 19.31) | 17.50 (17.20 - 17.80) | 20.18 (19.93 - 20.43) |
| 2008 | 19.02 (18.83 - 19.21) | 17.56 (17.26 - 17.86) | 19.99 (19.74 - 20.24) |
| 2009 | 18.03 (17.85 - 18.21) | 16.50 (16.22 - 16.78) | 19.04 (18.80 - 19.28) |
| 2010 | 18.55 (18.37 - 18.73) | 17.08 (16.79 - 17.36) | 19.53 (19.29 - 19.78) |
| 2011 | 18.54 (18.36 - 18.72) | 16.96 (16.69 - 17.24) | 19.62 (19.38 - 19.86) |
| 2012 | 18.33 (18.15 - 18.51) | 16.81 (16.54 - 17.08) | 19.36 (19.12 - 19.60) |
| 2013 | 17.63 (17.46 - 17.80) | 16.11 (15.85 - 16.37) | 18.69 (18.46 - 18.92) |
| 2014 | 17.44 (17.27 - 17.61) | 15.81 (15.56 - 16.07) | 18.58 (18.35 - 18.81) |
| 2015 | 17.95 (17.78 - 18.13) | 16.31 (16.06 - 16.57) | 19.12 (18.89 - 19.35) |
| 2016 | 17.63 (17.46 - 17.79) | 16.30 (16.05 - 16.56) | 18.67 (18.44 - 18.89) |
| 2017 | 17.55 (17.38 - 17.71) | 16.28 (16.03 - 16.53) | 18.52 (18.30 - 18.74) |
| 2018 | 16.86 (16.70 - 17.02) | 15.77 (15.53 - 16.01) | 17.72 (17.50 - 17.93) |
| 2019 | 16.24 (16.09 - 16.4)0 | 15.43 (15.20 - 15.67) | 16.89 (16.68 - 17.10) |
| 2020 | 18.95 (18.78 - 19.12) | 17.79 (17.54 - 18.04) | 19.88 (19.66 - 20.11) |
| 2021 | 20.70 (20.52 - 20.88) | 19.35 (19.08 - 19.62) | 21.83 (21.59 - 22.07) |
| 2022 | 20.30 (20.13 - 20.48) | 19.80 (19.54 - 20.07) | 20.95 (20.72 - 21.17) |
| 2023 | 19.38 (19.21 - 19.54) | 18.55 (18.29 - 18.80) | 20.18 (19.95 - 20.40) |
| **Average** | **18.70 (18.52 - 18.88)** | **17.44 (17.16 - 17.73)** | **19.56 (19.33 - 19.80)** |

**Supplemental Table 4**. Annual Percent Change (APC) and Average Annual Percent Change (AAPC) of UTI-Related Age-Adjusted Mortality Rates among Adults Aged 25 and Above in the United States, 1999 to 2023.

| **Year Interval** | **APC (95% CI), P-Value** | | **Year Interval** | **AAPC (95% CI), P-Value** |
| --- | --- | --- | --- | --- |
| **Overall** | | | | |
| 1999–2018 | | -0.77 (-1.21 to -0.45, p < 0.001) | 1999-2023 | 0.12 (-0.18 to 0.40, p = 0.369) |
| 2018–2023 | | 3.57 (1.57 to 8.02, p < 0.001) |  |  |
| **Sex/Gender** | | | | |
| **Men** | | | | |
| 1999–2018 | | -1.01 (-1.83 to 0.78, p = 0.063) | 1999-2023 | 0.00 (-0.31 to 0.44, p = 0.867) |
| 2018–2021 | | 7.17 (-3.38 to 8.86, p = 0.283) |  |  |
| 2021–2023 | | -0.79 (-4.85 to 4.65, p = 0.737)) |  |  |
| **Women** | | | | |
| 1999–2019 | | -0.54 (-1.00 to -0.25, p < 0.001) | 1999-2023 | 0.21 (-0.14 to 0.53, p = 0.192) |
| 2019–2023 | | 4.03 (1.25 to 9.96, p = 0.001) |  |  |
| **Race/Ethnicity** | | | | |
| **NH American Indian or Alaska Native** | | | | |
| 1999 - 2011 | | 2.21 (0.84 to 5.02, p = 0.018) | 1999-2023 | 0.89 (0.29 to 1.70, p = 0.008) |
| 2011 - 2018 | | -3.33 (-10.89 to -0.76, p = 0.032) |  |  |
| 2018 - 2021 | | 13.87 (6.40 to 19.20, p = 0.032) |  |  |
| 2021 - 2023 | | -9.65(-16.68 to -0.60, p = 0.042) |  |  |
| **NH Asian or Pacific Islander** | | | | |
| 1999 – 2008 | | 0.93 (-0.30 to 2.94, p = 0.138) | 1999-2023 | -0.38 (-0.71 to 0.08, p = 0.111) |
| 2008 – 2018 | | -3.81 (-5.61 to -2.90, p < 0.001) |  |  |
| 2018 – 2023 | | 4.39 (2.26 to 7.48, p < 0.001) |  |  |
| **NH Black or African American** | | | | |
| 1999–2018 | | -2.67 (-3.31 to -1.96, p = 0.039) | 1999-2023 | -1.49 (-1.93 to -1.02, p < 0.001) |
| 2018–2021 | | 8.12 (-5.65 to 10.31, p = 0.202) |  |  |
| 2021–2023 | | -3.95 (-9.65 to 3.83, p = 0.250) |  |  |
| **NH White** | | | | |
| 1999–2018 | | -0.39 (-0.80 to -0.08, p = 0.011) | 1999-2023 | 0.49 (0.20 to 0.78, p = 0.004) |
| 2018–2023 | | 3.93 (1.97 to 8.22, p < 0.001) |  |  |
| **Hispanic or Latino** | | | | |
| 1999–2018 | | -1.32 (-2.14 to -0.78, p < 0.001) | 1999-2023 | -0.26 (-0.71 to 0.18, p = 0.265) |
| 2018–2023 | | 3.86 (1.21 to 10.59, p = 0.006) |  |  |
| **Age Group** | | | | |
| **Young Adults** | | | | |
| 1999–2018 | | 1.56 (-0.03 to 2.24, p = 0.051) | 1999-2023 | 2.83 (2.12 to 3.47, p < 0.001) |
| 2018–2023 | | 7.84 (3.68 to 18.22, p < 0.001) |  |  |
| **Middle-Aged Adults** | | | | |
| 1999–2018 | | 1.65 (1.17 to 2.04, p < 0.001) | 1999-2023 | 2.13 (1.68 to 2.43, p < 0.001) |
| 2018–2021 | | 10.98 (7.03 to 13.08, p = 0.008) |  |  |
| 2021–2023 | | -5.80 (-11.13 to 0.66, p = 0.077) |  |  |
| **Older Adults** | | | | |
| 1999–2019 | | -0.93 (-1.30 to -0.65, p < 0.001) | 1999-2023 | -0.07 (-0.37 to 0.21, p = 0.659) |
| 2019–2023 | | 4.38 (1.77 to 10.01, p < 0.001) |  |  |
| **Urbanization (1999-2020)** | | | | |
| **Urban Areas** | | | | |
| 1999–2018 | | -0.97 (-2.74 to 3.15, p = 0.091) | 1999-2020 | -0.59 (-1.03 to -0.32, p < 0.001) |
| 2018–2020 | | 3.16 (-1.01 to 5.68, p = 0.404) |  |  |
| **Rural Areas** | | | | |
| 1999–2020 | | 0.09 (-0.19 to 0.39, p = 0.493) | 1999-2020 | 0.09 (-0.19 to 0.39, p = 0.493) |
| **Census Region** | | | | |
| **Northeast** | | | | |
| 1999–2011 | | -0.22 (-0.71 to 1.54, p = 0.623) | 1999-2023 | 0.00 (-0.26 to 0.33, p = 0.849) |
| 2011–2018 | | -2.41 (-6.07 to -1.20, p = 0.004) |  |  |
| 2018–2023 | | 4.03 (1.90 to 7.93, p = 0.002) |  |  |
| **Midwest** | | | | |
| 1999–2018 | | -0.61 (-1.72 to -0.20, p = 0.008) | 1999-2023 | 0.17 (-0.31 to 0.53, p = 0.398) |
| 2018–2023 | | 3.18 (0.45 to 9.90, p = 0.011) |  |  |
| **South** | | | | |
| 1999–2018 | | -0.99 (-1.38 to -0.66, p = 0.024) | 1999-2023 | -0.09 (-0.41 to 0.19, p = 0.494) |
| 2018–2021 | | 7.76 (-1.16 to 9.58, p = 0.093) |  |  |
| 2021–2023 | | -2.82 (-6.89 to 3.55, p = 0.211) |  |  |
| **West** | | | | |
| 1999–2008 | | 0.28 (-0.53 to 4.11, p = 0.469) | 1999-2023 | 0.26 (-0.02 to 0.64, p = 0.066) |
| 2008–2019 | | -1.47 (-4.49 to -0.88, p = 0.004) |  |  |
| 2019–2023 | | 5.15 (2.57 to 9.72, p < 0.001) |  |  |
| **UTI as UCD** | | | | |
| 1999-2006 | -0.71 (-2.91 to 1.56, p = 0.402) | | 1999-2023 | -1.56 (-2.01 to -1.17, p < 0.001) |
| 2006-2009 | -11.76 (-13.68 to 0.77, p = 0.060) | |  |  |
| 2009-2019 | -0.85 (-11.17 to 0.23, p = 0.090) | |  |  |
| 2019-2023 | 3.38 (0.13 to 9.39, p = 0.036) | |  |  |
| **COVID-19 as UCD and UTI as MCD** | | | | |
| 2020-2023 | -26.05 (-58.19 to 15.10, p = 0.154) | | 2020-2023 | -26.05 (-58.19 to 15.10, p = 0.154) |

NH: Non-Hispanic; APC: Annual Percent Change, AAPC: Average Annual Percent Change, UTI = Urinary Tract Infection, UCD = Underlying Cause of Death, MCD = Multiple Cause of Death/Contributing Cause of Death

**Supplemental Table 5**. Race/ Ethnicity Stratified UTI-Related Age-Adjusted Mortality Rates among Adults Aged ≥ 25 Years in the United States, 1999 to 2023.

| **Age-Adjusted Mortality Rate /100,000 (95% CI)** | | | | |  |
| --- | --- | --- | --- | --- | --- |
| **Year** | **NH American Indian or Alaska Native** | **NH Asian or Pacific Islander** | **NH Black or African American** | **NH White** | **Hispanic or Latino** |
| **1999** | 16.53 (13.14 - 19.91) | 11.29 (10.10 - 12.48) | 30.43 (29.50 - 31.36) | 19.38 (19.16 - 19.60) | 16.53 (15.57 - 17.49) |
| **2000** | 19.74 (16.20 - 23.27) | 11.11 (9.99 - 12.23) | 29.18 (28.28 - 30.08) | 18.91 (18.70 - 19.13) | 16.31 (15.39 - 17.24) |
| **2001** | 21.27 (17.69 - 24.84) | 11.46 (10.37 - 12.54) | 28.96 (28.07 - 29.86) | 18.67 (18.45 - 18.89) | 15.57 (14.70 - 16.45) |
| **2002** | 19.41 (16.01 - 22.81) | 11.05 (10.00 - 12.09) | 28.69 (27.81 - 29.58) | 18.71 (18.50 - 18.93) | 15.33 (14.48 - 16.18) |
| **2003** | 21.37 (17.81 - 24.93) | 9.89 (8.94 - 10.83) | 27.69 (26.83 - 28.56) | 18.63 (18.41 - 18.84) | 15.48 (14.65 - 16.30) |
| **2004** | 18.32 (15.15 - 21.49) | 11.24 (10.26 - 12.23) | 26.71 (25.87 - 27.56) | 18.42 (18.21 - 18.63) | 15.28 (14.47 - 16.09) |
| **2005** | 22.83 (19.26 - 26.40) | 11.52 (10.56 - 12.48) | 27.32 (26.47 - 28.16) | 19.86 (19.64 - 20.08) | 15.88 (15.08 - 16.68) |
| **2006** | 19.36 (16.14 - 22.58) | 11.19 (10.28 - 12.10) | 26.14 (25.33 - 26.96) | 18.91 (18.70 - 19.12) | 16.17 (15.39 - 16.95) |
| **2007** | 21.95 (18.58 - 25.33) | 11.41 (10.51 - 12.30) | 25.61 (24.81 - 26.41) | 18.93 (18.72 - 19.14) | 15.34 (14.60 - 16.08) |
| **2008** | 23.81 (20.40 - 27.23) | 12.14 (11.24 - 13.03) | 24.90 (24.13 - 25.68) | 18.86 (18.65 - 19.07) | 15.13 (14.42 - 15.84) |
| **2009** | 23.03 (19.68 - 26.38) | 11.46 (10.62 - 12.30) | 23.02 (22.29 - 23.76) | 17.97 (17.77 - 18.17) | 13.97 (13.31 - 14.63) |
| **2010** | 23.16 (19.90 - 26.41) | 10.86 (10.06 - 11.67) | 22.31 (21.60 - 23.03) | 18.62 (18.41 - 18.82) | 15.11 (14.43 - 15.78) |
| **2011** | 25.46 (22.13 - 28.80) | 10.49 (9.74 - 11.24) | 22.35 (21.65 - 23.05) | 18.71 (18.51 - 18.91) | 13.93 (13.31 - 14.54) |
| **2012** | 23.78 (20.70 - 26.85) | 9.92 (9.22 - 10.62) | 21.81 (21.13 - 22.49) | 18.52 (18.32 - 18.72) | 14.30 (13.69 - 14.90) |
| **2013** | 19.92 (17.18 - 22.66) | 9.93 (9.26 - 10.60) | 20.76 (20.11 - 21.42) | 17.83 (17.63 - 18.02) | 13.99 (13.41 - 14.58) |
| **2014** | 21.33 (18.61 - 24.05) | 9.27 (8.64 - 9.89) | 20.27 (19.64 - 20.91) | 17.74 (17.54 - 17.93) | 13.24 (12.69 - 13.79) |
| **2015** | 21.97 (19.29 - 24.65) | 8.84 (8.25 - 9.43) | 20.23 (19.61 - 20.85) | 18.42 (18.22 - 18.61) | 13.37 (12.83 - 13.90) |
| **2016** | 20.12 (17.64 - 22.61) | 8.76 (8.19 - 9.33) | 20.09 (19.48 - 20.70) | 18.14 (17.94 - 18.33) | 13.18 (12.66 - 13.69) |
| **2017** | 20.89 (18.41 - 23.38) | 8.44 (7.90 - 8.98) | 19.34 (18.76 - 19.93) | 18.13 (17.94 - 18.32) | 13.37 (12.87 - 13.88) |
| **2018** | 20.03 (17.69 - 22.36) | 7.50 (7.01 - 7.99) | 18.70 (18.13 - 19.27) | 17.54 (17.36 - 17.73) | 12.55 (12.07 - 13.03) |
| **2019** | 18.94 (16.70 - 21.19) | 7.74 (7.25 - 8.23) | 17.77 (17.23 - 18.31) | 16.95 (16.77 - 17.14) | 11.75 (11.30 - 12.21) |
| **2020** | 24.69 (22.22 - 27.15) | 9.31 (8.79 - 9.83) | 22.27 (21.67 - 22.87) | 19.46 (19.27 - 19.66) | 14.97 (14.48 - 15.47) |
| **2021** | 28.91 (26.09 - 31.73) | 9.35 (8.82 - 9.88) | 23.15 (22.53 - 23.77) | 21.68 (21.47 - 21.90) | 15.84 (15.33 - 16.36) |
| **2022** | 25.40 (22.88 - 27.92) | 9.71 (9.19 - 10.23) | 23.16 (22.55 - 23.77) | 21.33 (21.13 - 21.53) | 15.00 (14.52 - 15.49) |
| **2023** | 22.92 (20.56 - 25.27) | 9.34 (8.84 - 9.83) | 21.15 (20.57 - 21.73) | 20.44 (20.24 - 20.64) | 14.72 (14.24 - 15.20) |
| **Average** | **21.81 (18.8 - 24.81)** | **10.13 (9.36 - 10.9)** | **23.68 (22.96 - 24.40)** | **18.83 (18.63-19.03)** | **14.65 (14.00 - 14.65)** |

NH: Non-Hispanic

**Supplemental Table 6**. Age Group Stratified UTI-Related Age-Adjusted Mortality Rate Among Adults Aged ≥ 25 Years in the United States, 1999 to 2023.

|  | **Age-Adjusted Mortality Rate /100,000 (95% CI)** | | |
| --- | --- | --- | --- |
| **Year** | **Young Adults** | **Middle-Aged Adults** | **Older Adults** |
| 1999 | 0.47 (0.43 - 0.52) | 3.21 (3.07 - 3.36) | 95.76 (94.72 - 96.80) |
| 2000 | 0.42 (0.37 - 0.46) | 3.25 (3.11 - 3.40) | 93.28 (92.27 - 94.30) |
| 2001 | 0.52 (0.47 - 0.57) | 3.25 (3.11 - 3.39) | 91.84 (90.84 - 92.84) |
| 2002 | 0.47 (0.43 - 0.52) | 3.35 (3.21 - 3.49) | 91.60 (90.61 - 92.59) |
| 2003 | 0.52 (0.47 - 0.57) | 3.43 (3.30 - 3.57) | 90.48 (89.50 - 91.46) |
| 2004 | 0.42 (0.38 - 0.46) | 3.31 (3.18 - 3.45) | 89.16 (88.20 - 90.13) |
| 2005 | 0.52 (0.47 - 0.57) | 3.63 (3.50 - 3.77) | 95.18 (94.19 - 96.17) |
| 2006 | 0.47 (0.43 - 0.52) | 3.61 (3.48 - 3.75) | 90.84 (89.89 - 91.80) |
| 2007 | 0.52 (0.47 - 0.57) | 3.63 (3.50 - 3.76) | 90.20 (89.26 - 91.15) |
| 2008 | 0.52 (0.47 - 0.57) | 3.79 (3.66 - 3.92) | 89.43 (88.50 - 90.36) |
| 2009 | 0.52 (0.47 - 0.57) | 3.67 (3.54 - 3.80) | 84.58 (83.68 - 85.47) |
| 2010 | 0.62 (0.56 - 0.67) | 3.67 (3.54 - 3.80) | 87.00 (86.10 - 87.90) |
| 2011 | 0.57 (0.52 - 0.63) | 3.97 (3.84 - 4.10) | 86.54 (85.65 - 87.42) |
| 2012 | 0.57 (0.52 - 0.63) | 3.99 (3.86 - 4.12) | 85.42 (84.55 - 86.29) |
| 2013 | 0.57 (0.52 - 0.63) | 4.03 (3.90 - 4.16) | 81.78 (80.94 - 82.63) |
| 2014 | 0.57 (0.52 - 0.63) | 3.95 (3.82 - 4.08) | 80.96 (80.13 - 81.79) |
| 2015 | 0.57 (0.52 - 0.63) | 4.33 (4.19 - 4.46) | 82.92 (82.08 - 83.75) |
| 2016 | 0.57 (0.52 - 0.63) | 4.27 (4.13 - 4.40) | 81.34 (80.53 - 82.15) |
| 2017 | 0.63 (0.57 - 0.68) | 4.46 (4.33 - 4.60) | 80.46 (79.66 - 81.26) |
| 2018 | 0.57 (0.52 - 0.63) | 4.39 (4.25 - 4.52) | 77.22 (76.44 - 77.99) |
| 2019 | 0.57 (0.52 - 0.63) | 4.33 (4.19 - 4.46) | 74.16 (73.41 - 74.91) |
| 2020 | 0.73 (0.67 - 0.79) | 5.46 (5.30 - 5.61) | 85.65 (84.86 - 86.45) |
| 2021 | 0.88 (0.82 - 0.95) | 5.99 (5.83 - 6.15) | 93.29 (92.44 - 94.14) |
| 2022 | 0.88 (0.82 - 0.95) | 5.75 (5.60 - 5.91) | 91.70 (90.88 - 92.51) |
| 2023 | 0.78 (0.72 - 0.84) | 5.22 (5.07 - 5.37) | 88.12 (87.32 - 88.92) |
| **Average** | **0.58 (0.53 - 0.63)** | **4.08 (3.94 - 4.22)** | **87.16 (86.27 - 88.05)** |

**Supplemental Table 7**. Urbanization Stratified UTI-related Age-Adjusted Mortality Rates Among Adults Aged ≥ 25 Years in the United States, 1999 to 2020.

| **Age-Adjusted Mortality Rate /100,000 (95% CI)** | | |
| --- | --- | --- |
| **Year** | **Urban Areas** | **Rural Areas** |
| 1999 | 19.75 (19.52 - 19.98) | 21.18 (20.69 - 21.67) |
| 2000 | 19.22 (19.00 - 19.45) | 20.78 (20.30 - 21.26) |
| 2001 | 18.92 (18.70 - 19.15) | 20.73 (20.25 - 21.21) |
| 2002 | 18.79 (18.57 - 19.01) | 21.33 (20.84 - 21.81) |
| 2003 | 18.61 (18.39 - 18.83) | 21.21 (20.73 - 21.69) |
| 2004 | 18.36 (18.15 - 18.58) | 20.55 (20.07 - 21.02) |
| 2005 | 19.46 (19.24 - 19.68) | 22.85 (22.35 - 23.34) |
| 2006 | 18.70 (18.49 - 18.91) | 21.64 (21.16 - 22.12) |
| 2007 | 18.53 (18.32 - 18.74) | 21.81 (21.33 - 22.29) |
| 2008 | 18.40 (18.20 - 18.61) | 21.88 (21.41 - 22.36) |
| 2009 | 17.40 (17.20 - 17.60) | 20.93 (20.46 - 21.39) |
| 2010 | 18.00 (17.80 - 18.20) | 20.97 (20.51 - 21.43) |
| 2011 | 17.84 (17.65 - 18.04) | 21.68 (21.22 - 22.15) |
| 2012 | 17.58 (17.38 - 17.77) | 21.74 (21.28 - 22.20) |
| 2013 | 17.00 (16.81 - 17.18) | 20.67 (20.22 - 21.12) |
| 2014 | 16.78 (16.60 - 16.97) | 20.57 (20.12 - 21.02) |
| 2015 | 17.13 (16.95 - 17.31) | 21.97 (21.51 - 22.43) |
| 2016 | 16.85 (16.67 - 17.03) | 21.50 (21.05 - 21.96) |
| 2017 | 16.85 (16.67 - 17.03) | 21.07 (20.62 - 21.51) |
| 2018 | 16.05 (15.88 - 16.22) | 20.96 (20.52 - 21.40) |
| 2019 | 15.44 (15.27 - 15.60) | 20.27 (19.84 - 20.69) |
| 2020 | 18.07 (17.89 - 18.25) | 23.53 (23.07 - 23.98) |
| **Average** | **17.87 (17.68 - 18.10)** | **21.35 (20.89 - 21.82)** |

**Supplemental Table 8**. Census Region-Stratified UTI-related Age-Adjusted Mortality Rates Among Adults Aged ≥ 25 Years in the United States, 1999 to 2023.

| **Age-Adjusted Mortality Rate /100,000 (95% CI)** | | | | |
| --- | --- | --- | --- | --- |
| **Year** | **Northeast** | **Midwest** | **South** | **West** |
| 1999 | 17.31 (16.89 - 17.73) | 18.88 (18.47 - 19.29) | 22.87 (22.49 - 23.25) | 19.47 (19.01 - 19.94) |
| 2000 | 16.88 (16.47 - 17.29) | 17.85 (17.45 - 18.25) | 22.56 (22.19 - 22.94) | 19.19 (18.73 - 19.65) |
| 2001 | 16.74 (16.33 - 17.15) | 17.67 (17.27 - 18.06) | 22.12 (21.75 - 22.49) | 19.02 (18.56 - 19.47) |
| 2002 | 17.08 (16.67 - 17.48) | 17.86 (17.47 - 18.26) | 21.87 (21.50 - 22.23) | 18.72 (18.27 - 19.16) |
| 2003 | 16.59 (16.19 - 16.99) | 17.66 (17.27 - 18.05) | 21.42 (21.06 - 21.77) | 19.53 (19.08 - 19.98) |
| 2004 | 16.90 (16.49 - 17.30) | 17.52 (17.13 - 17.90) | 20.69 (20.34 - 21.04) | 19.05 (18.62 - 19.49) |
| 2005 | 17.96 (17.55 - 18.37) | 19.28 (18.88 - 19.68) | 22.14 (21.78 - 22.50) | 19.74 (19.30 - 20.17) |
| 2006 | 16.98 (16.58 - 17.38) | 18.30 (17.91 - 18.69) | 20.83 (20.48 - 21.17) | 19.85 (19.42 - 20.29) |
| 2007 | 16.88 (16.48 - 17.27) | 18.44 (18.05 - 18.82) | 20.68 (20.35 - 21.02) | 19.52 (19.09 - 19.94) |
| 2008 | 16.89 (16.50 - 17.28) | 18.45 (18.06 - 18.83) | 20.38 (20.05 - 20.71) | 19.48 (19.07 - 19.90) |
| 2009 | 15.60 (15.22 - 15.97) | 17.04 (16.68 - 17.41) | 19.65 (19.33 - 19.97) | 18.71 (18.31 - 19.12) |
| 2010 | 16.53 (16.14 - 16.91) | 17.43 (17.06 - 17.80) | 19.92 (19.60 - 20.24) | 19.37 (18.96 - 19.78) |
| 2011 | 17.12 (16.74 - 17.51) | 18.03 (17.66 - 18.41) | 19.34 (19.03 - 19.65) | 18.98 (18.59 - 19.38) |
| 2012 | 16.30 (15.93 - 16.68) | 17.52 (17.15 - 17.88) | 19.78 (19.47 - 20.09) | 18.56 (18.18 - 18.95) |
| 2013 | 15.58 (15.21 - 15.94) | 16.44 (16.09 - 16.79) | 19.12 (18.82 - 19.42) | 18.18 (17.80 - 18.56) |
| 2014 | 15.48 (15.12 - 15.84) | 16.62 (16.27 - 16.97) | 18.85 (18.56 - 19.15) | 17.56 (17.19 - 17.92) |
| 2015 | 15.61 (15.25 - 15.97) | 16.93 (16.58 - 17.28) | 19.82 (19.53 - 20.12) | 17.86 (17.50 - 18.22) |
| 2016 | 14.87 (14.52 - 15.22) | 16.63 (16.28 - 16.97) | 19.71 (19.42 - 20.01) | 17.46 (17.10 - 17.81) |
| 2017 | 14.35 (14.01 - 14.69) | 16.63 (16.28 - 16.97) | 19.79 (19.50 - 20.08) | 17.42 (17.07 - 17.77) |
| 2018 | 14.12 (13.79 - 14.46) | 16.06 (15.73 - 16.40) | 18.81 (18.53 - 19.09) | 16.72 (16.38 - 17.06) |
| 2019 | 13.34 (13.02 - 13.67) | 15.51 (15.18 - 15.83) | 18.47 (18.20 - 18.74) | 15.54 (15.22 - 15.86) |
| 2020 | 15.61 (15.26 - 15.96) | 18.71 (18.35 - 19.07) | 21.66 (21.37 - 21.95) | 17.40 (17.06 - 17.73) |
| 2021 | 16.53 (16.17 - 16.89) | 19.73 (19.35 - 20.10) | 23.67 (23.35 - 23.98) | 20.13 (19.76 - 20.50) |
| 2022 | 17.09 (16.73 - 17.45) | 19.09 (18.73 - 19.45) | 22.77 (22.47 - 23.06) | 20.01 (19.65 - 20.37) |
| 2023 | 16.22 (15.87 - 16.57) | 18.03 (17.68 - 18.38) | 21.90 (21.61 - 22.19) | 19.01 (18.66 - 19.36) |
| **Average** | **16.18 (15.81 - 16.56)** | **17.69 (17.32 - 18.06)** | **20.75 (20.43 - 21.07)** | **18.66 (18.26 - 19.05)** |

**Supplemental Table 9**. State-Stratified UTI-Related Age-Adjusted Mortality Rate and Number of Deaths with Respective Percentage of Deaths Among Adults Aged ≥ 25 Years in the United States, 1999 to 2023.

| **State** | **AAMR**  **(1999 - 2019)** | **AAMR**  **(2020 - 2023)** | **Deaths**  **(1999 - 2023)** | **Deaths %**  **(1999 - 2023)** |
| --- | --- | --- | --- | --- |
| Alabama | 20.77 | 19.53 | 17,417 | 1.68% |
| Alaska | 16.22 | 17.69 | 1,080 | 0.10% |
| Arizona | 12.05 | 13.47 | 14,491 | 1.40% |
| Arkansas | 21.12 | 22.20 | 11,571 | 1.12% |
| California | 20.02 | 18.54 | 118,860 | 11.46% |
| Colorado | 16.44 | 22.80 | 13,386 | 1.29% |
| Connecticut | 17.14 | 15.17 | 12,623 | 1.22% |
| Delaware | 18.38 | 17.86 | 3,109 | 0.30% |
| District of Columbia | 21.19 | 20.12 | 2,081 | 0.20% |
| Florida | 11.98 | 17.65 | 59,575 | 5.74% |
| Georgia | 18.03 | 18.18 | 24,377 | 2.35% |
| Hawaii | 10.40 | 9.46 | 2,909 | 0.28% |
| Idaho | 18.27 | 21.76 | 4,992 | 0.48% |
| Illinois | 17.06 | 16.76 | 38,625 | 3.72% |
| Indiana | 20.77 | 24.00 | 24,537 | 2.37% |
| Iowa | 17.46 | 22.29 | 12,267 | 1.18% |
| Kansas | 15.36 | 19.67 | 8,866 | 0.85% |
| Kentucky | 25.67 | 31.70 | 20,062 | 1.93% |
| Louisiana | 19.98 | 20.94 | 14,890 | 1.44% |
| Maine | 17.85 | 14.90 | 5,000 | 0.48% |
| Maryland | 20.17 | 22.81 | 20,301 | 1.96% |
| Massachusetts | 16.63 | 17.94 | 22,553 | 2.17% |
| Michigan | 17.11 | 17.23 | 31,940 | 3.08% |
| Minnesota | 14.28 | 18.93 | 15,256 | 1.47% |
| Mississippi | 26.52 | 37.59 | 14,121 | 1.36% |
| Missouri | 16.83 | 17.62 | 19,359 | 1.87% |
| Montana | 16.19 | 20.96 | 3,422 | 0.33% |
| Nebraska | 15.91 | 22.66 | 6,188 | 0.60% |
| Nevada | 13.78 | 17.35 | 5,881 | 0.57% |
| New Hampshire | 16.72 | 18.29 | 4,246 | 0.41% |
| New Jersey | 14.56 | 15.64 | 25,030 | 2.41% |
| New Mexico | 16.86 | 17.51 | 5,978 | 0.58% |
| New York | 15.57 | 15.53 | 58,455 | 5.63% |
| North Carolina | 24.83 | 20.70 | 38,722 | 3.73% |
| North Dakota | 14.70 | 18.25 | 2,273 | 0.22% |
| Ohio | 19.46 | 17.22 | 42,452 | 4.09% |
| Oklahoma | 26.93 | 47.49 | 20,404 | 1.97% |
| Oregon | 17.76 | 23.37 | 14,033 | 1.35% |
| Pennsylvania | 15.84 | 17.24 | 45,066 | 4.34% |
| Rhode Island | 25.49 | 17.88 | 5,576 | 0.54% |
| South Carolina | 25.92 | 26.49 | 21,042 | 2.03% |
| South Dakota | 17.54 | 27.86 | 3,353 | 0.32% |
| Tennessee | 29.18 | 26.76 | 31,560 | 3.04% |
| Texas | 21.82 | 23.37 | 77,495 | 7.47% |
| Utah | 19.92 | 23.01 | 6,910 | 0.67% |
| Vermont | 19.52 | 20.90 | 2,483 | 0.24% |
| Virginia | 19.47 | 18.12 | 25,136 | 2.42% |
| Washington | 22.20 | 24.77 | 26,267 | 2.53% |
| West Virginia | 27.73 | 29.25 | 10,648 | 1.03% |
| Wisconsin | 16.07 | 20.17 | 18,704 | 1.80% |
| Wyoming | 19.11 | 25.86 | 1,899 | 0.18% |
| **Total** | **18.3517** | **19.8134** | **1,037,471** | **100.00%** |

AAMR = Age-Adjusted Mortality Rate

**Supplemental Table 10**. Top 15 Leading Causes of UTI-Associated Deaths, by Number of Deaths among Adults Aged ≥ 25 Years in the United States, 1999 to 2019, and 2020 to 2023.

| **UCD - 15 Leading Causes of Death** | **Deaths**  **(1999-2019)** | **UCD - 15 Leading Causes of Death** | **Deaths**  **(2020-2023)** |
| --- | --- | --- | --- |
| Heart disease | 79,718 | Malignant neoplasms | 19,379 |
| Malignant neoplasms | 63,767 | Heart disease | 17,345 |
| Cerebrovascular diseases | 42,428 | COVID-19 | 11,519 |
| Alzheimer's disease | 41,022 | Cerebrovascular diseases | 10,306 |
| Influenza and pneumonia | 23,080 | Alzheimer's disease | 8,791 |
| Diabetes mellitus | 22,686 | Sepsis | 6,325 |
| Sepsis | 20,397 | Influenza and pneumonia | 4,208 |
| Chronic lower respiratory diseases | 18,535 | Chronic lower respiratory diseases | 3,880 |
| Nephritis, nephrotic syndrome, and nephrosis | 14,965 | Accidents (unintentional injuries) | 3,854 |
| Accidents (unintentional injuries) | 11,567 | Diabetes mellitus | 3,703 |
| Parkinson's disease | 10,827 | Nephritis, nephrotic syndrome, and nephrosis | 3,339 |
| Enterocolitis due to Clostridium difficile | 8,022 | Parkinson's disease | 2,932 |
| Pneumonitis due to solids and liquids | 7,054 | Chronic liver disease and cirrhosis | 2,213 |
| Essential hypertension and hypertensive renal disease | 6,851 | Pneumonitis due to solids and liquids | 1,871 |
| Prostatic Hyperplasia | 5,901 | Nutritional deficiencies | 1,805 |

UCD = Underlying Cause of Death

**Supplemental Table 11**. Top 15-Leading Causes of UTI-Associated Deaths, by Age-Adjusted Mortality among Adults Aged ≥ 25 Years in the United States, 1999 to 2019, and 2020 to 2023.

| **Age-Adjusted Mortality Rate (AAMR) /100,000 (95% CI)** | | | |
| --- | --- | --- | --- |
| **UCD - 15 Leading Causes of Death** | **AAMR**  **(1999-2019)** | **UCD - 15 Leading Causes of Death** | **AAMR**  **(2020-2023)** |
| Heart disease | 1.77 (1.75 - 1.78) | Malignant neoplasms | 1.76 (1.74 - 1.79) |
| Malignant neoplasms | 1.43 (1.42 - 1.44) | Heart disease | 1.64 (1.62 - 1.67) |
| Cerebrovascular diseases | 0.94 (0.93 - 0.95) | COVID-19 | 1.09 (1.07 - 1.11) |
| Alzheimer's disease | 0.91 (0.90 - 0.92) | Cerebrovascular diseases | 0.95 (0.93 - 0.97) |
| Influenza and pneumonia | 0.50 (0.49 - 0.51) | Alzheimer's disease | 0.84 (0.82 - 0.85) |
| Diabetes mellitus | 0.51 (0.51 - 0.52) | Sepsis | 0.57 (0.56 - 0.59) |
| Sepsis | 0.45 (0.45 - 0.46) | Influenza and pneumonia | 0.40 (0.38 - 0.41) |
| Chronic lower respiratory diseases | 0.41 (0.40 - 0.41) | Chronic lower respiratory diseases | 0.36 (0.35 - 0.37) |
| Nephritis, nephrotic syndrome, and nephrosis | 0.32 (0.31 - 0.32) | Unintentional injuries | 0.37 (0.36 - 0.38) |
| Unintentional injuries | 0.24 (0.23 - 0.24) | Diabetes mellitus | 0.33 (0.31 - 0.34) |
| Parkinson's disease | 0.24 (0.24 - 0.24) | Nephritis, nephrotic syndrome, and nephrosis | 0.29 (0.28 - 0.30) |
| Enterocolitis due to Clostridium difficile | 0.16 (0.16 - 0.17) | Parkinson's disease (G20-G21) | 0.28 (0.27 - 0.29) |
| Pneumonitis due to solids and liquids | 0.16 (0.15 - 0.16) | Chronic liver disease and cirrhosis | 0.22 (0.21 - 0.23) |
| Essential hypertension and hypertensive renal disease | 0.14 (0.13 - 0.14) | Pneumonitis due to solids and liquids | 0.17 (0.16 - 0.17) |
| Prostatic hyperplasia | 0.13 (0.12 - 0.13) | Nutritional deficiencies | 0.17 (0.17 - 0.18) |

UCD = Underlying Cause of Death

**Supplemental Table 12**. Number of Deaths and Age-Adjusted Mortality Rate when UTI is the Underlying Cause of Death among Adults Aged ≥ 25 years in the United States from 1999 to 2023.

| **Age-Adjusted Mortality Rate /100,000 (95% CI)** | | |
| --- | --- | --- |
| **Year** | **Deaths** | **AAMR (1999-2023)** |
| 1999 | 14,275 | 8.17 (8.04 - 8.31) |
| 2000 | 14,003 | 7.87 (7.74 - 8.00) |
| 2001 | 14,218 | 7.86 (7.73 - 7.99) |
| 2002 | 13,995 | 7.65 (7.52 - 7.78) |
| 2003 | 14,093 | 7.55 (7.43 - 7.68) |
| 2004 | 14,174 | 7.50 (7.37 - 7.62) |
| 2005 | 15,217 | 7.88 (7.75 - 8.01) |
| 2006 | 14,623 | 7.40 (7.28 - 7.52) |
| 2007 | 14,696 | 7.26 (7.15 - 7.38) |
| 2008 | 11,187 | 5.41 (5.31 - 5.51) |
| 2009 | 10,945 | 5.19 (5.09 - 5.28) |
| 2010 | 11,097 | 5.17 (5.08 - 5.27) |
| 2011 | 11,404 | 5.16 (5.06 - 5.25) |
| 2012 | 11,402 | 5.04 (4.95 - 5.13) |
| 2013 | 11,473 | 4.96 (4.87 - 5.06) |
| 2014 | 11,900 | 5.03 (4.94 - 5.13) |
| 2015 | 12,410 | 5.16 (5.06 - 5.25) |
| 2016 | 12,459 | 5.04 (4.95 - 5.13) |
| 2017 | 12,255 | 4.86 (4.77 - 4.94) |
| 2018 | 12,152 | 4.71 (4.62 - 4.79) |
| 2019 | 11,757 | 4.46 (4.38 - 4.54) |
| 2020 | 13,069 | 4.89 (4.81 - 4.98) |
| 2021 | 14,182 | 5.50 (5.40 - 5.59) |
| 2022 | 14,874 | 5.44 (5.35 - 5.53) |
| 2023 | 14,057 | 5.15 (5.06 - 5.23) |
| **Total/Average** | **325,917** | **6.01 (5.91 - 6.12)** |

**Supplemental Table 13.** Number of Deaths and Age-Adjusted Mortality Rate when COVID-19 is the Underlying Cause of Death and UTI is a Contributing Cause of Death among Adults Aged ≥ 25 Years in the United States from 2020 to 2023.

| **Age-Adjusted Mortality Rate /100,000 (95% CI)** | | |
| --- | --- | --- |
| **Year** | **Deaths** | **AAMR (1999-2023)** |
| 2020 | 3,764 | 1.41 (1.37 - 1.46) |
| 2021 | 3,693 | 1.41 (1.37 - 1.46) |
| 2022 | 2,927 | 1.09 (1.05 - 1.13) |
| 2023 | 1,135 | 0.40 (0.38 - 0.43) |
| **Total/Average** | **11,519** | **1.08 (1.04 - 1.12)** |

**Supplemental Figure 1.** UTI-related Deaths, Stratified by State, 1999-2023.


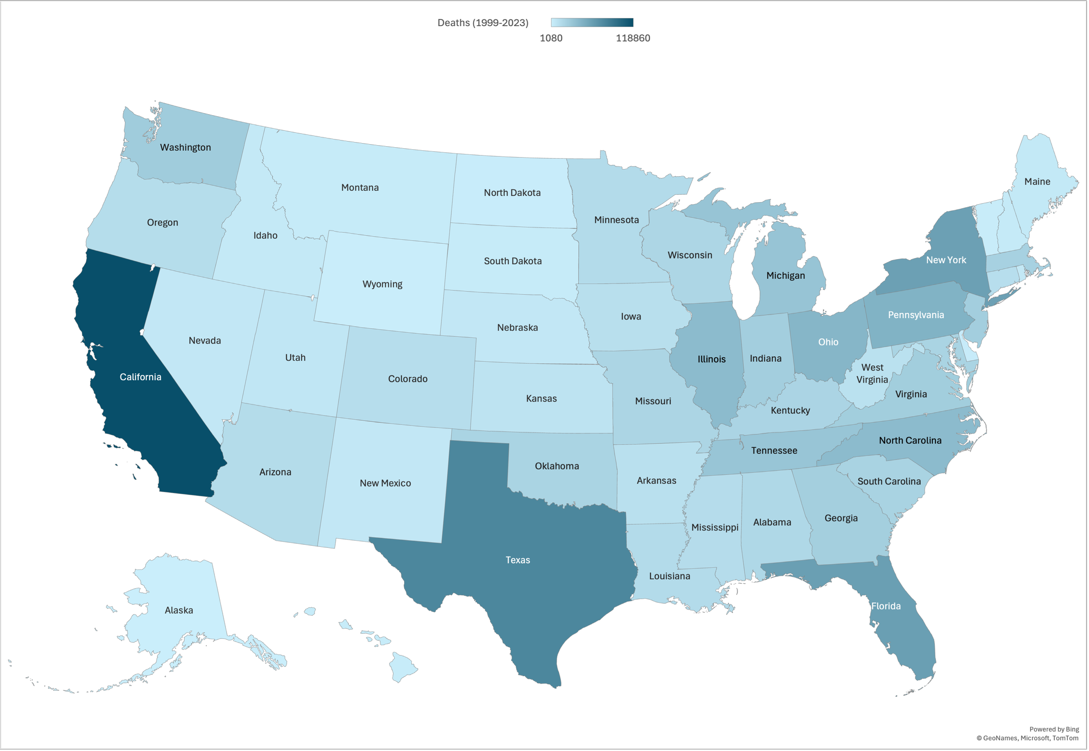


**Supplemental Figure 2.** UTI-related Age-Adjusted Mortality Rate, Stratified by State, 1999 to 2019.


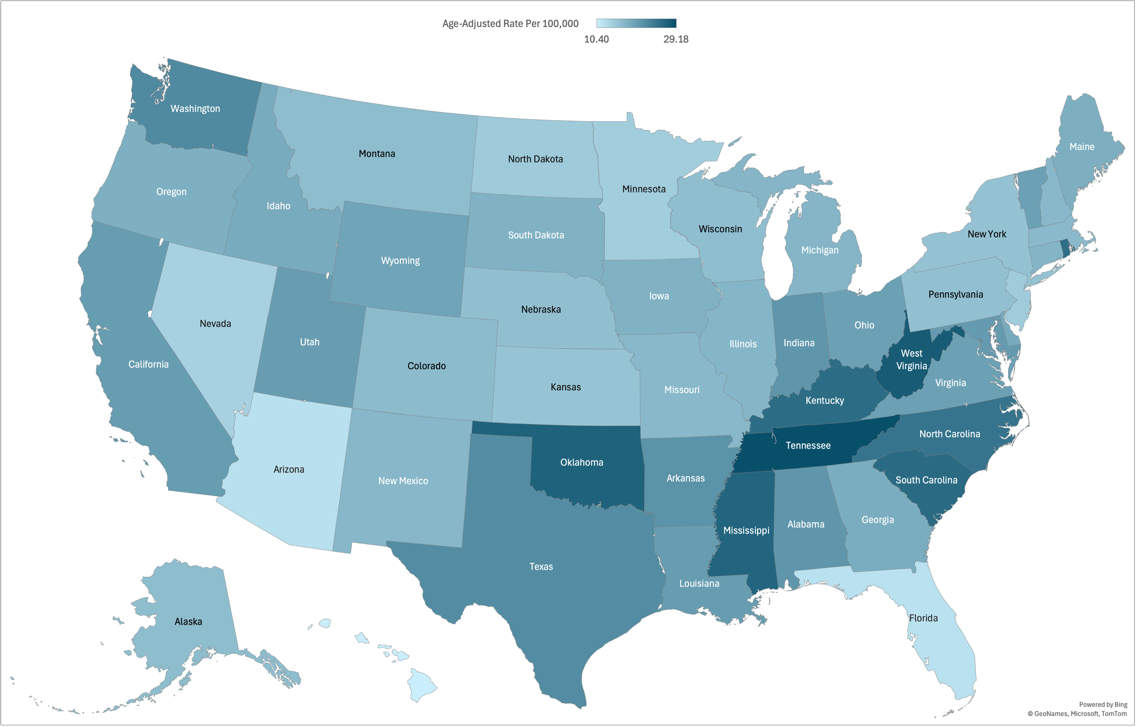


**Supplemental Figure 3.** UTI-related Age-Adjusted Mortality Rate, Stratified by State, 2020 to 2023.


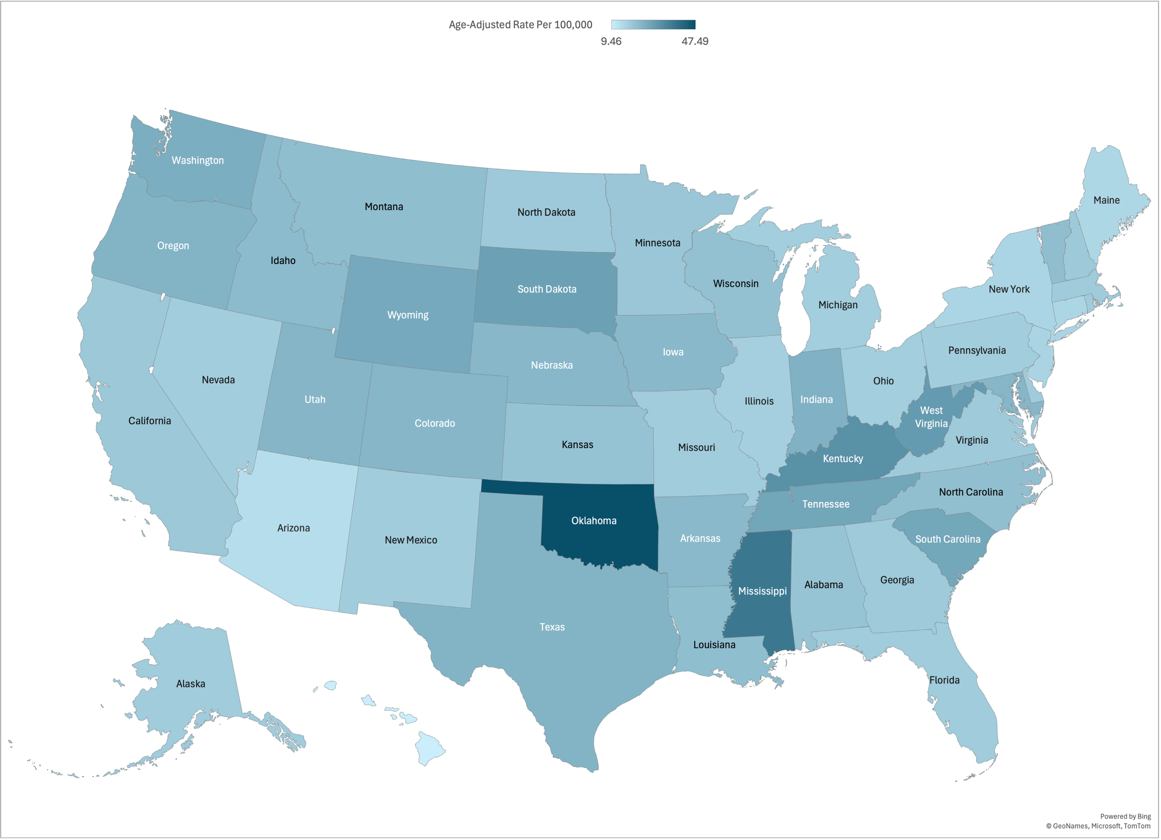


**Supplemental Figure 4.** Top 15 Leading Causes of UTI-Associated Deaths, by Number of Deaths, 1999 to 2019

**Supplemental Figure 5.** Top 15 Leading Causes of UTI-Associated Deaths, by Number of Deaths, 2020 to 2023.

**Supplemental Figure 6.** Top 15-Leading Causes of UTI-Associated Deaths, by Age-Adjusted Mortality Rate, 1999 to 2019.

**Supplemental Figure 7.** Top 15-Leading Causes of UTI-Associated Deaths, by Age-Adjusted Mortality among Adults Aged ≥ 25 Years in the United States, 2020 to 2023.
